# Supplementary material for: Prevalence of Hypertension and Associated Factors among Residents Aged ≥18 Years in Ganzhou, China: A Cross-Sectional Study
Source: Int J Hypertens. 2023 Oct 5;2023:5486139. doi: 10.1155/2023/5486139 (PMC10569894; doi:10.1155/2023/5486139)
Supplement: Supplementary Materials — Table S1: univariate Statistics of missing value analysis. Table S2: cross-tabulations of categorical versus indicator variables. [file 5486139.f1.pdf]

### Processing of missing values

Missing values should be at most 20% of variables. Table S1 shows 1427 missing values (19.2%) for Salt intake. Monthly income and frequency of getting drunk are missing 697 (9.4%) and 608 (8.2%), respectively. Variables with less than 5% missing values won't be analyzed. We compared the rate of missing values for the three variables in hypertensive and non-hypertensive individuals and found no significant impact on outcome variables (Salt intake:18.9% vs. 20.0%; The monthly average income per capita:9.1% vs. 10.2%; Frequency of getting drunk: 8.8% vs. 6.7%), as shown in table S2.

Before conducting the regression analysis, we performed imputation separately for the three abovementioned variables due to missing values. The Replacement of missing values of the salt variable was processed by the method of Series mean substitution, while the other two were imputed with the method of the median of nearby points.

In summary, our larger sample size and pre-processing minimize the chances of significant bias in the results.

**Table S1 Univariate Statistics of missing value analysis**

| Variables                                     | N    | Mean    | Std. Deviation | Missing |         |
|-----------------------------------------------|------|---------|----------------|---------|---------|
|                                               |      |         |                | Count   | Percent |
| Salt intake (per capita daily)                | 6003 | 7.7264  | 14.05915       | 1427    | 19.2    |
| Intake of edible oil (per capita daily)       | 7372 | 39.7949 | 24.65084       | 58      | 0.8     |
| Age (years)                                   | 7430 |         |                | 0       | 0.0     |
| Sex                                           | 7430 |         |                | 0       | 0.0     |
| Ethnic                                        | 7421 |         |                | 9       | 0.1     |
| Education                                     | 7381 |         |                | 49      | 0.7     |
| Occupation                                    | 7398 |         |                | 32      | 0.4     |
| The monthly average income per capita (Yuan)  | 6733 |         |                | 697     | 9.4     |
| Family history of hypertension?               | 7430 |         |                | 0       | 0.0     |
| The average amount of cigarettes smoked daily | 7406 |         |                | 24      | 0.3     |
| Frequency of getting drunk                    | 6822 |         |                | 608     | 8.2     |

|                             |      |  |  |     |     |
|-----------------------------|------|--|--|-----|-----|
| Frequency of vegetable      | 7349 |  |  | 81  | 1.1 |
| Frequency of fruit          | 7323 |  |  | 107 | 1.4 |
| Frequency of dairy products | 7357 |  |  | 73  | 1.0 |
| Sleep (hours)               | 7307 |  |  | 123 | 1.7 |
| BMI                         | 7406 |  |  | 24  | 0.3 |
| Central obesity             | 7369 |  |  | 61  | 0.8 |
| Hypertension                | 7430 |  |  | 0   | 0.0 |

**Table S2 Crosstabulations of Categorical Versus Indicator Variables**

|                                              |         |          | Total | Non-Hypertension | Hypertension |
|----------------------------------------------|---------|----------|-------|------------------|--------------|
| Salt intake (per capita daily)               | Present | Count    | 6003  | 4314             | 1689         |
|                                              |         | Percent  | 80.8  | 81.1             | 80.0         |
|                                              | Missing | % SysMis | 19.2  | 18.9             | 20.0         |
| The monthly average income per capita (Yuan) | Present | Count    | 6733  | 4837             | 1896         |
|                                              |         | Percent  | 90.6  | 90.9             | 89.8         |
|                                              | Missing | % SysMis | 9.4   | 9.1              | 10.2         |
| Frequency of getting drunk                   | Present | Count    | 6822  | 4852             | 1970         |
|                                              |         | Percent  | 91.8  | 91.2             | 93.3         |
|                                              | Missing | % SysMis | 8.2   | 8.8              | 6.7          |

Note: Indicator variables with less than 5% missing are not displayed.
